# Supplementary material for: Oxidation- and thermo-responsive poly(N-isopropylacrylamide-co-2-hydroxyethyl acrylate) hydrogels cross-linked via diselenides for controlled drug delivery
Source: Royal Society of Chemistry journal article supplement (doi:10.1039/c4ra13500h), 2014-12-06
Supplement: c4ra13500h1.pdf [file c4ra13500h1.pdf]

**Supporting Information for:**

**Oxidation- and thermo-responsive poly(N-isopropylacrylamide-co-2-hydroxyethyl acrylate) hydrogels cross-linked via diselenides for controlled drug delivery**

Xinfeng Cheng<sup>a,b</sup>, Yong Jin<sup>\*c,d</sup>, Tongbing Sun<sup>a,b</sup>, Rui Qi<sup>a,b</sup>, Baozhu Fan<sup>a,b</sup>,  
Hanping Li<sup>c,d</sup>

<sup>a</sup>Chengdu Institute of Organic Chemistry, Chinese Academy of Science, Center of Polymer Science and Technology, Chengdu 610041, People's Republic of China

<sup>b</sup>University of Chinese Academy of Sciences, No.19A Yuquan Road, Beijing 100049, People's Republic of China

<sup>c</sup>National Engineering Laboratory for Clean Technology of Leather Manufacture, Sichuan University, Chengdu 610065, People's Republic of China. E-mail: jinyong@cioc.ac.cn; Tel: +86-28-85214963

<sup>d</sup>Key Laboratory of Leather Chemistry and Engineering (Sichuan University), Ministry of Education, Chengdu 610065, People's Republic of China

**Table S1**

| Samples | Feed compositions / mmol |       |      | Theoretical NIPAM content (mol%) | NIPAM content in the copolymer (mol%) <sup>a</sup> | Yield (%) |
|---------|--------------------------|-------|------|----------------------------------|----------------------------------------------------|-----------|
|         | NIPA M                   | HEA   | AIBN |                                  |                                                    |           |
| PNH9/1  | 45                       | 5.00  | 3.40 | 90                               | 93                                                 | 93        |
| PNH     | 45                       | 11.25 | 3.40 | 80                               | 84                                                 | 93        |
| PNH5/5  | 45                       | 45.00 | 3.40 | 50                               | 62                                                 | 95        |

<sup>a</sup> calculated from <sup>1</sup>H NMR analysis results.

**Table S1.** Feed and result compositions of poly(NIPAM-co-HEA) copolymers.**Fig. S1**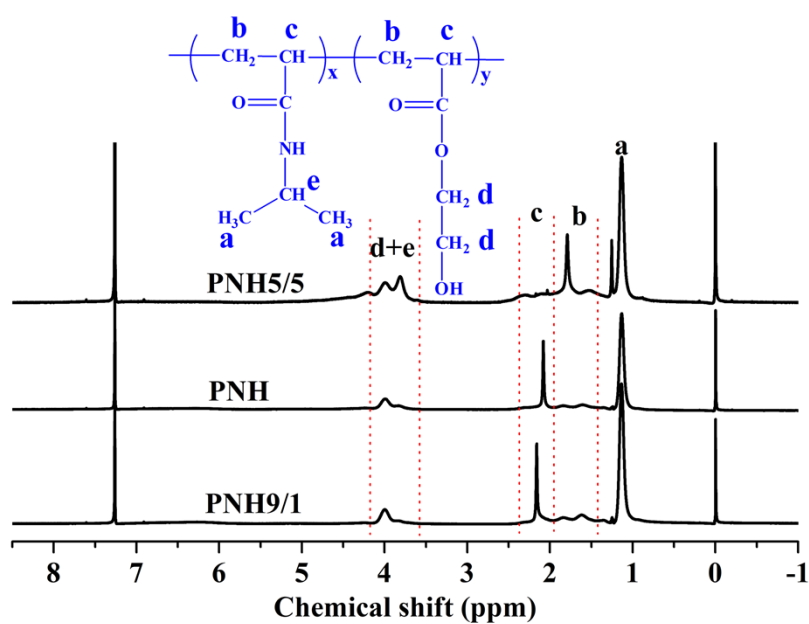**Fig. S1.** <sup>1</sup>H NMR spectra of PNH9/1, PNH and PNH5/5 in CDCl<sub>3</sub>.

**Fig. S2**

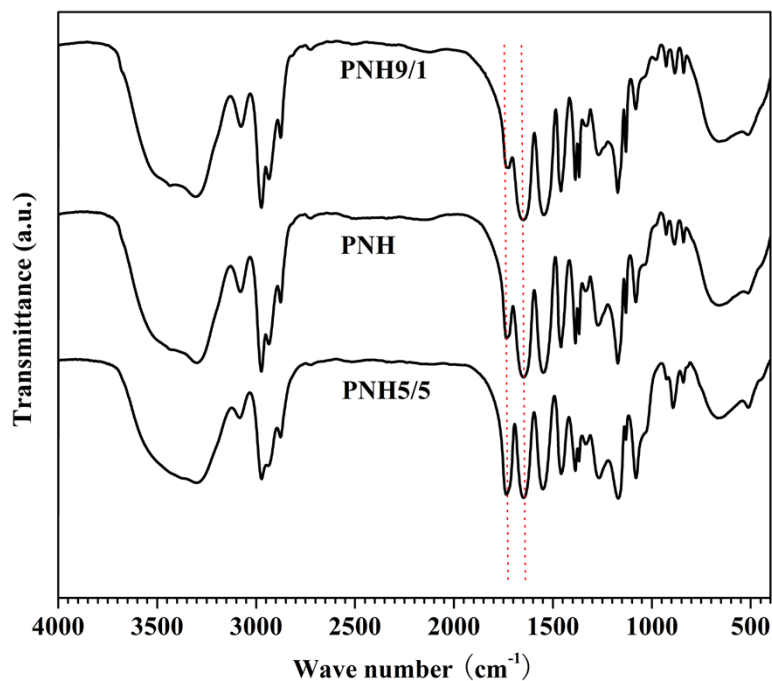

**Fig. S2.** FT-IR spectra of PNH9/1, PNH and PNH5/5.

**Table S2**

| <i>Sample</i>   | <i>Compositions (g)</i> |                | <i>Gelation time (h)<sup>a</sup></i> | <i>Yield (%)</i> |
|-----------------|-------------------------|----------------|--------------------------------------|------------------|
|                 | PNH                     | IPDI-SeSe-IPDI |                                      |                  |
| PNH-SeSe1       | 3.28                    | 0.20           | No gelation                          | –                |
| PNH-SeSe2/Gel 1 | 3.28                    | 0.60           | 6                                    | 86               |
| PNH-SeSe3/Gel 2 | 3.28                    | 1.80           | 3                                    | 95               |

<sup>a</sup>The gelation time was determined at the time point when the mixture solution became an immobile gel in the inverted cuvette at room temperature.

**Table S2.** Compositions, gelation time and yields of the mixing solution containing PNH and IPDI-SeSe-IPDI.

Fig. S3

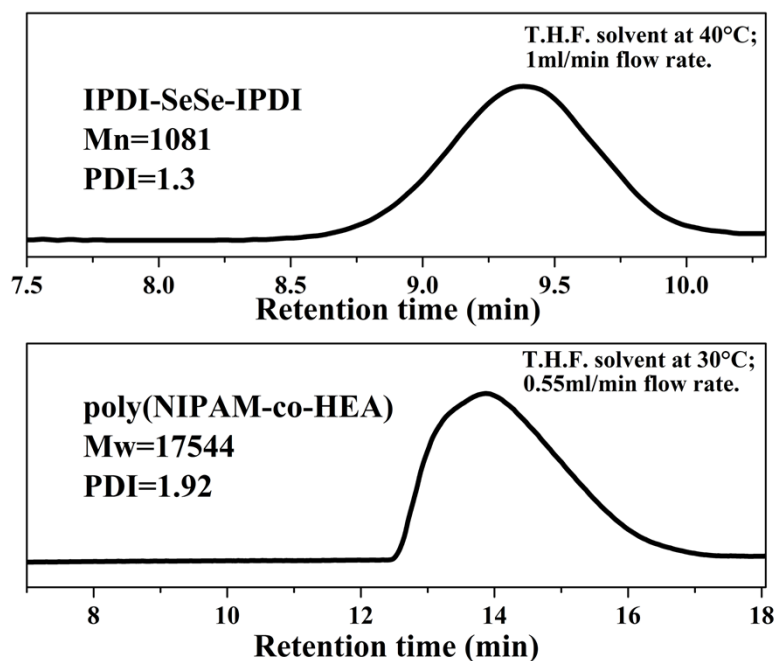

Fig. S3. GPC trace of copolymer PNH and the crosslinking agent IPDI-SeSe-IPDI.

Fig. S4.

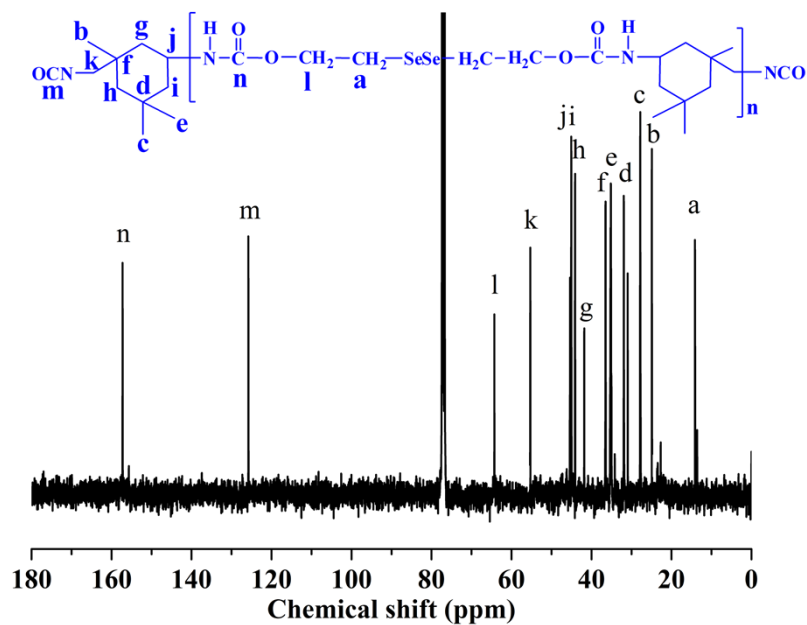

Fig. S4.  $^{13}\text{C}$  NMR spectrum of the crosslinker IPDI-SeSe-IPDI in  $\text{CDCl}_3$ .

**Fig. S5.**

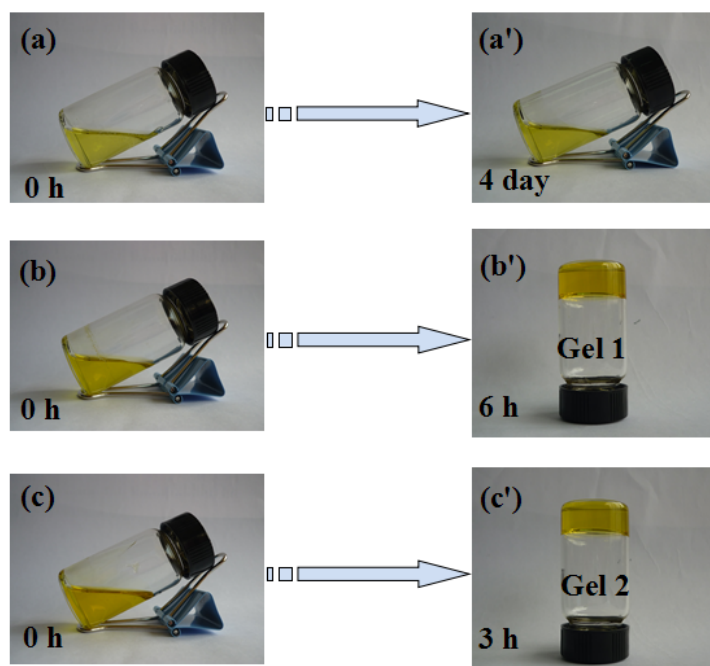

**Fig. S5.** Time-dependent sol-gel transition of mixing solution containing PNH copolymers (3.28 g) and IPDI-SeSe-IPDI crosslinkers varying from 0.20 g (a and a'), 0.60 g (b and b') and 1.80 g (c and c').

**Fig. S6.**

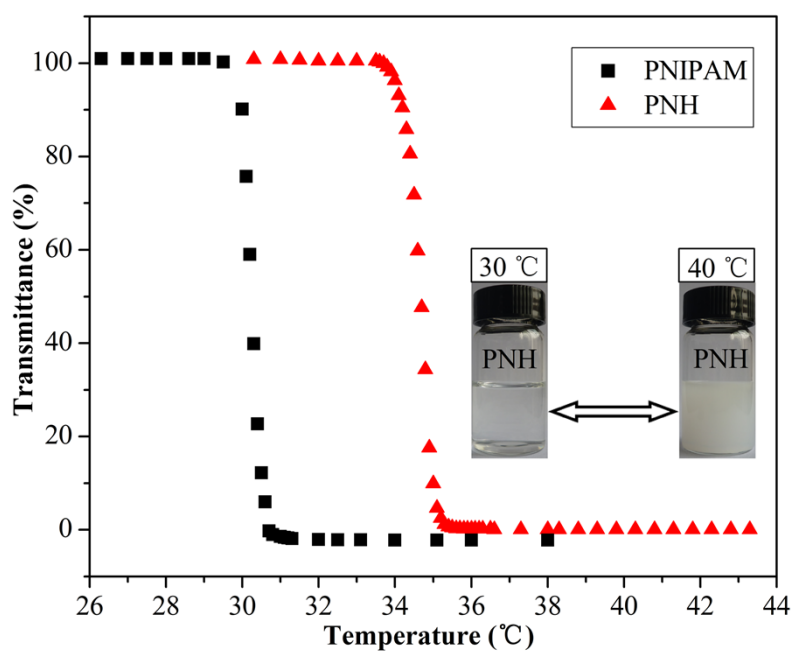

**Fig. S6.** Turbidity measurements of PNIPAM homopolymer and PNH copolymer.

**Fig. S7.**

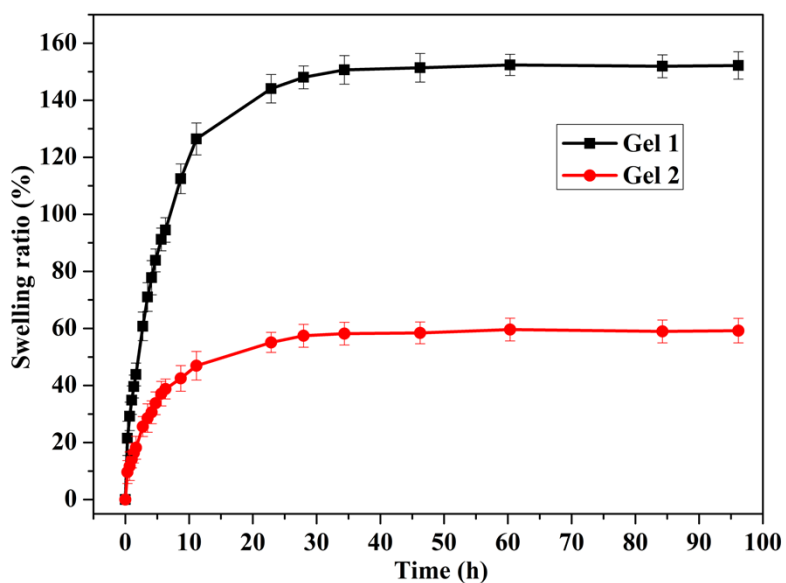

**Fig. S7.** Dynamic swelling behavior of the PNH-SeSe hydrogels with different crosslinker content (Gel 1, 15% wt; Gel 2, 35% wt) in distilled water at 25 °C.

**Fig. S8.**

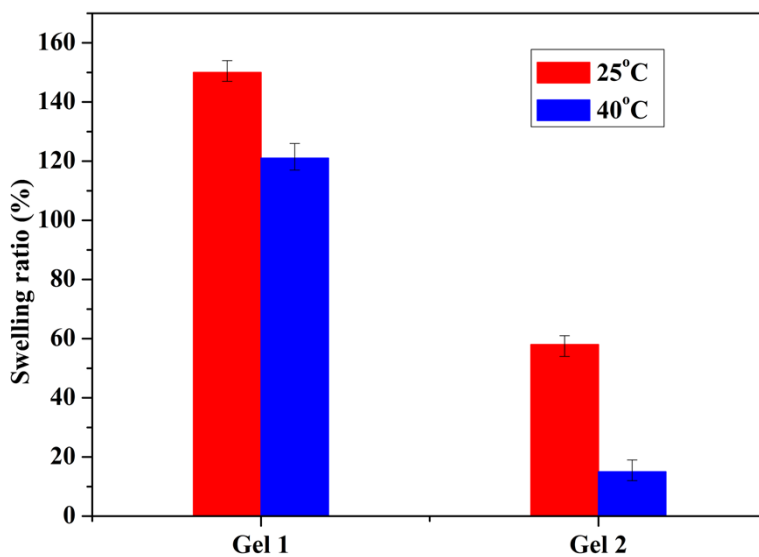

**Fig. S8.** Thermo-sensitive swelling ratios of the PNH-SeSe hydrogels with different crosslinker content (wt%): Gel 1 (15% wt); Gel 2 (35% wt).

**Fig. S9.**

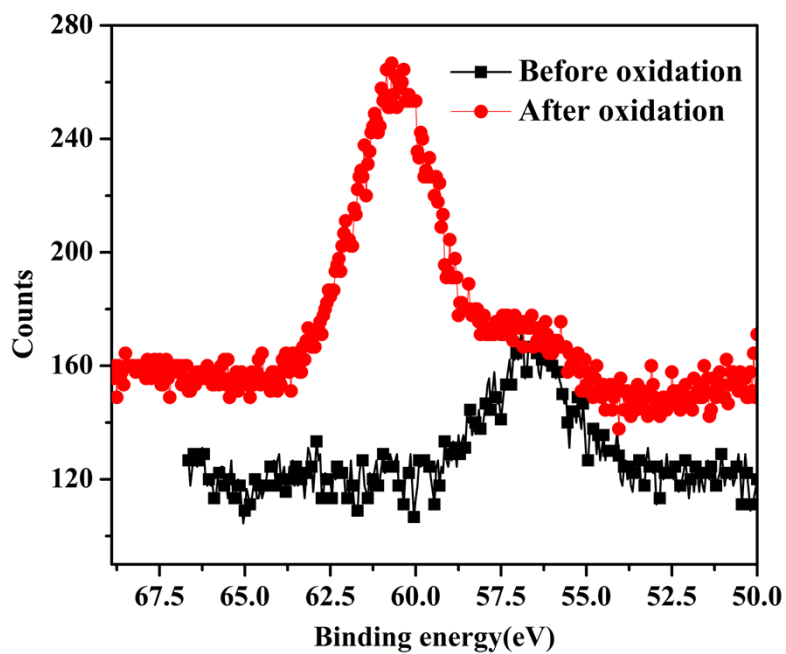

**Fig. S9.** XPS analysis of the model compound  $\text{HOCH}_2\text{CH}_2\text{SeSeCH}_2\text{CH}_2\text{OH}$  before and after oxidation in 0.5%wt  $\text{H}_2\text{O}_2$  solution.

**Fig. S10.**

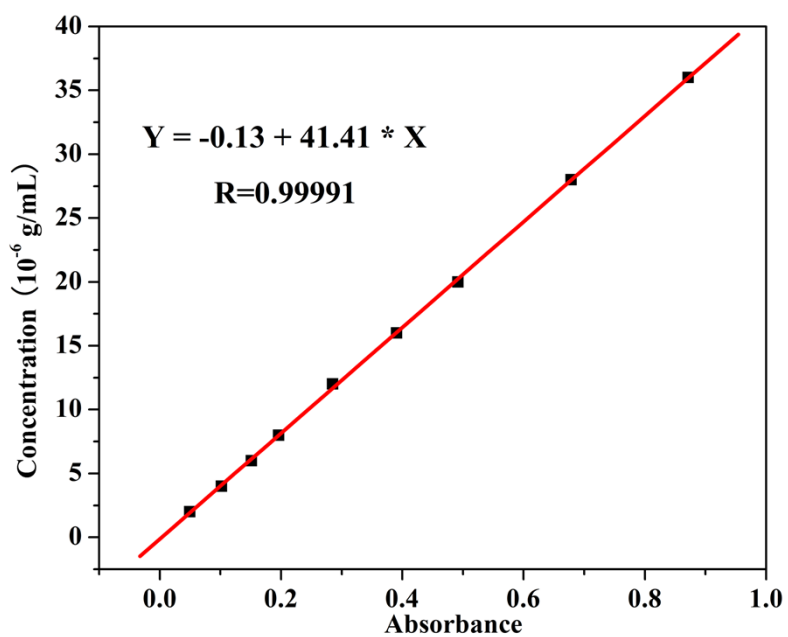

**Fig. S10.** Calibration curve of the salicylic acid in distilled water.
